# Supplementary material for: Coding and noncoding de novo variation converge on developmental trajectories of cortical layer 5–6 neurons in autism spectrum disorder
Source: Research Square preprint supplement (doi:10.21203/rs.3.rs-7841641/v1), 2025-11-25
Supplement: Supplementary file 1 [file c73ad928c14dc725396637e9.xlsx]

## Sheet: Broadly Expressed Genes
	gene	tissue_count
0	ADAM23	36
1	IREB2	39
2	KMT2C	39
3	CUL3	39
4	ADNP	39
5	BRWD1	39
6	UBR3	39
7	DYRK1A	39
8	PRPF4B	39
9	EP300	39
10	PAX8	36
11	YEATS2	39
12	BAZ2B	39
13	RERE	39
14	AHDC1	39
15	CDK16	39
16	ARHGAP30	39
17	TCF7L2	39
18	JARID2	39
19	DIP2C	38
20	CHD8	39
21	WAC	39
22	ANK2	36
23	NBEA	37
24	NFIB	38
25	ANKRD11	39
26	GIGYF2	39
27	ANKRD17	39
28	EEF2	39
29	PPP2R5D	39
30	AP2M1	39
31	WDR33	39
32	TBL1XR1	39
33	TERF2	39
34	LARP4B	39
35	MBD5	39
36	RALGAPB	39
37	ARHGAP5	39
38	ARHGEF7	39
39	ARHGEF9	39
40	ARID1B	39
41	PTK7	37
42	PHF21A	39
43	VCP	39
44	ARID5B	39
45	ASH1L	39
46	HECTD1	39
47	HIVEP2	39
48	SH2B1	39
49	CNOT3	39
50	MED13L	39
51	ITCH	39
52	ATP1B1	39
53	SRCAP	39
54	BAZ1B	39
55	SON	39
56	BCAR1	38
57	PRR12	39
58	KMT2B	39
59	SATB1	39
60	TRIO	39
61	PHF12	39
62	BIRC6	39
63	BRD4	39
64	BRSK1	38
65	TANC2	39
66	POGZ	39
67	BTAF1	39
68	ITPR1	39
69	AMD1	39
70	NF1	39
71	USP34	39
72	CACNA2D1	38
73	RFX3	39
74	CASK	39
75	CTDSPL2	39
76	CLTC	39
77	CHD2	39
78	SHANK3	38
79	CDC23	39
80	CDC73	39
81	MORC4	39
82	CDK19	39
83	PRPF39	39
84	CECR2	35
85	EIF3A	39
86	CHAF1A	39
87	CHD1	39
88	FOXP1	39
89	INO80	39
90	SPTBN4	36
91	UBR5	39
92	NCOA1	39
93	ZMYND8	39
94	CIC	39
95	KDM3A	39
96	ZZZ3	39
97	ZNF608	39
98	SKI	39
99	CTCF	39
100	MAP1B	38
101	CTNNB1	39
102	SYNGAP1	39
103	SRPK2	39
104	CUL1	39
105	SMARCE1	39
106	JADE2	39
107	ZRANB1	39
108	MED13	39
109	RAI1	39
110	MTMR12	39
111	SPAST	39
112	DOT1L	39
113	CLIP1	39
114	KIF3C	39
115	DST	38
116	ZNF292	39
117	DYNC1H1	39
118	TLK2	39
119	TRIP12	39
120	CHM	39
121	EHMT1	39
122	NOL6	39
123	GLYR1	39
124	ILF2	39
125	EP400	39
126	QRICH1	39
127	ZNF462	37
128	MYH11	39
129	HNRNPD	39
130	FBN1	38
131	FBXO11	39
132	SPEN	39
133	FERMT2	38
134	KDM6B	39
135	PSMD12	39
136	SVIL	39
137	DDX3X	39
138	KMT2E	39
139	WDFY3	39
140	KAT6A	39
141	RANBP2	39
142	GGNBP2	39
143	USP15	39
144	SMARCC2	39
145	SETD2	39
146	ZC3H4	39
147	NCKAP1	38
148	RAPGEF4	38
149	SIN3A	39
150	HECTD4	39
151	CACTIN	39
152	HERC1	39
153	XPO4	39
154	HSP90AA1	39
155	OFD1	39
156	SETD5	39
157	SRRM2	39
158	L1CAM	38
159	KIAA0368	39
160	CSDE1	39
161	NFIA	39
162	KIAA0232	39
163	SLC6A8	39
164	MYH10	39
165	SPTBN1	39
166	ANP32A	39
167	ZC3H18	39
168	IQSEC2	39
169	PHF3	39
170	SPAG9	39
171	SIK3	39
172	MORC3	39
173	KDM4B	39
174	UBAP2L	39
175	KDR	38
176	YTHDC1	39
177	ZFHX3	38
178	SETBP1	39
179	KMT2A	39
180	HSP90AB1	39
181	THRB	38
182	LRRC4	38
183	LZTS3	39
184	STAG1	39
185	RUNX1T1	37
186	MAP2K7	39
187	FURIN	39
188	TAOK1	39
189	TSHZ1	39
190	IWS1	39
191	SCAF1	39
192	TCF4	39
193	MYRF	37
194	NAA15	39
195	CDKL5	39
196	NACC1	39
197	TP53BP1	39
198	PRR14L	39
199	NEBL	36
200	NMT1	39
201	NOTCH1	39
202	PCSK5	39
203	ZC3H11A	36
204	PHF2	39
205	PHIP	39
206	STXBP5	39
207	ARHGAP44	38
208	SRSF11	39
209	TAF4	39
210	RFX7	39
211	RAB2A	39
212	SMURF1	39
213	FOXO1	39
214	ZNF618	38
215	TCF20	39
216	NCBP1	39
217	NCOA6	39
218	SUFU	39
219	FNBP4	39
220	UPF3B	39
221	TNRC18	39
222	RNF38	39
223	TNRC6B	39
224	THSD7A	35
225	DLL1	38
226	CTTNBP2	38
227	CBX4	39
228	ZMYND11	39
229	MEMO1	39
230	VCPIP1	39
231	ATP1A1	39
232	YLPM1	39

## Sheet: Narrowly Expressed Genes
	gene	tissue_count
0	ADCY2	32
1	ASXL3	29
2	BCL11A	30
3	BTBD11	24
4	CELF4	27
5	CSMD2	15
6	CUX2	16
7	DLGAP1	18
8	DSCAM	13
9	DSCAML1	30
10	EBF3	29
11	ELAVL2	12
12	EPHB1	33
13	EPHB2	34
14	FAM169A	33
15	FMN2	21
16	FOXP2	33
17	GRIA2	22
18	GRIN2B	12
19	HGF	33
20	HUNK	29
21	JAKMIP1	23
22	KCNQ2	13
23	LMTK3	33
24	LRP2	16
25	MUC5B	5
26	MYT1L	12
27	NRXN1	20
28	PAX5	4
29	PCDH19	28
30	PCSK2	29
31	PRDM16	34
32	PTPRZ1	32
33	RELN	33
34	RIMS1	17
35	RIMS2	15
36	RORB	26
37	RYR2	34
38	RYR3	34
39	SCN2A	14
40	SHANK2	30
41	TBR1	5
42	TBX21	20
43	TRIM71	9
44	TTN	25
45	UNC79	17
46	XKR6	30
